# Supplementary material for: Effect of Periodontal Treatment on Glycemic Control of Diabetic Patients
Source: Oxford University Press journal article supplement (doi:10.2337/dc09-1378), 2010-01-26
Supplement: dc09-1378_online_appendix.pdf [file dc09-1378_online_appendix.pdf]

**Online Appendix Table 1** *Papers which were excluded from the review after full text reading in reversed chronological order: A) General reports with the main reason for exclusion. B) Reviews and meta-analyses used for screening of unpublished data and reference checking, in reversed chronological order. C) Intervention studies excluded which do not meet all inclusion criteria. The studies are ranked in reversed chronological order and with the main reasons for rejection.*

### **A**

| <b>Author(s)</b>            | <b>Main reason for exclusion</b>                                                                              |
|-----------------------------|---------------------------------------------------------------------------------------------------------------|
| Nelson et al. 2008 (1)      | Commentary; no original investigation                                                                         |
| Lalla et al. 2007 (2)       | Editorial; no original investigation                                                                          |
| Friedlander et al. 2006 (3) | Letter to the editor; no original investigation                                                               |
| Watts 2006 (4)              | Letter to the editor; no original investigation                                                               |
| Dietrich & Garcia 2005 (5)  | Statistical review evaluating the strength of evidence of designs of several periodontal intervention studies |

### **B**

| <b>Author(s)</b>            | <b>Type of study</b> | <b>Results</b>                |
|-----------------------------|----------------------|-------------------------------|
| Darre et al. 2008 (6)       | Meta-analysis        | No further new data retrieved |
| Mealey & Rose 2008 (7)      | Traditional review   | No further new data retrieved |
| Mealey & Rose 2008 (8)      | Traditional review   | No further new data retrieved |
| Taylor & Borgnakke 2008 (9) | Systematic review    | No further new data retrieved |
| Kuo et al. 2008 (10)        | Traditional review   | No further new data retrieved |
| Skamagas et al. 2008 (11)   | Traditional review   | No further new data retrieved |
| Perrino 2007 (12)           | Traditional review   | No further new data retrieved |
| Mealey & Ocampo 2007 (13)   | Traditional review   | No further new data retrieved |
| Mealey 2006 (14)            | Traditional review   | No further new data retrieved |
| Mealey & Oates 2006 (15)    | Traditional review   | No further new data retrieved |
| Herringsh & Shah 2006 (16)  | Traditional review   | No further new data retrieved |
| Anil & Al-Ghamdi 2006 (17)  | Traditional review   | No further new data retrieved |
| Nesse et al. 2006 (18)      | Traditional review   | No further new data retrieved |
| Janket et al. 2005 (19)     | Meta-analysis        | No further new data retrieved |
| D'Áiuto et al. 2005 (20)    | Traditional review   | No further new data retrieved |
| Pucher & Stewart 2004 (21)  | Traditional review   | No further new data retrieved |
| Taylor 2003 (22)            | Traditional review   | No further new data retrieved |
| Mealey & Rethman 2003 (23)  | Traditional review   | No further new data retrieved |
| Moore 2002 (24)             | Traditional review   | No further new data retrieved |
| Taylor 2001 (25)            | Traditional review   | No further new data retrieved |
| Grossi 2001 (26)            | Traditional review   | No further new data retrieved |
| Mealey 2000 (27)            | Traditional review   | No further new data retrieved |
| Taylor et al. 2000 (28)     | Traditional review   | No further new data retrieved |
| Mealey 1999 (29)            | Position paper       | No further new data retrieved |
| Gustke 1999 (30)            | Traditional review   | No further new data retrieved |
| Taylor 1999 (31)            | Traditional review   | No further new data retrieved |
| Grossi & Genco 1998 (32)    | Traditional review   | No further new data retrieved |
| Saadoun 1980 (33)           | Traditional review   | No further new data retrieved |
| Scopp 1977 (34)             | Traditional review   | No further new data retrieved |

## C

| Author                           | Study design | Main reason for rejection                                                                                                    |
|----------------------------------|--------------|------------------------------------------------------------------------------------------------------------------------------|
| Dag et al. 2009 (35)             | CCT          | Control group contained systemically healthy subjects with periodontitis. Control group received periodontal treatment (SRP) |
| Matsumoto et al. 2009 (36)       | RCT          | Control group received periodontal treatment (SRP)                                                                           |
| Tervonen et al. 2009 (37)        | UCT          | No control group                                                                                                             |
| Llambes et al. 2008 (38)         | RCT          | Control group received periodontal treatment (SRP)                                                                           |
| Madden et al. 2008 (39)          | RCT          | Control group received periodontal treatment (SRP)                                                                           |
| Da Cruz et al. 2008 (40)         | CCT          | Control group contained systemically healthy subjects with periodontitis. Control group received periodontal treatment (SRP) |
| Concalves et al. 2008 (41)       | Case-control | Control group contained systemically healthy subjects with periodontitis. Control group received periodontal treatment (SRP) |
| Correa et al. 2008 (42)          | CCT          | Control group contained systemically healthy subjects with periodontitis. Control group received periodontal treatment (SRP) |
| Makiura et al. 2008 (43)         | UCT          | No control group                                                                                                             |
| O'Connell et al. 2008 (44)       | RCT          | Control group received periodontal treatment (SRP + placebo)                                                                 |
| McCoy et al. 2008 (45)           | UCT          | No control group                                                                                                             |
| Navarro-Sanchez et al. 2007 (46) | RCT          | Control group contained systemically healthy subjects with periodontitis. Control group received periodontal treatment (SRP) |
| Lalla et al. 2007 (47)           | UCT          | No control group                                                                                                             |
| Campus et al. 2007 (48)          | UCT          | No control group                                                                                                             |
| Yun et al. 2007 (49)             | RCT          | Control group received systemic antibiotics (doxycycline 100mg/day for 14 days)                                              |
| Sonoki et al. 2006 (50)          | CCT          | Control group contained systemically healthy subjects with periodontitis. Control group received periodontal treatment (SRP) |
| Talbert et al. 2006 (51)         | UCT          | No control group                                                                                                             |
| Schara et al. 2006 (52)          | UCT          | No control group; treatment group received full-mouth disinfection according to Quirynen et al. 1995 (53)                    |
| Faria-Almeida 2006 (54)          | CCT          | Control group contained systemically healthy subjects with periodontitis. Control group received periodontal treatment (SRP) |
| Skaleric et al. 2004 (55)        | RCT          | Control group received periodontal treatment (SRP)                                                                           |
| Rodrigues et al. 2003 (56)       | RCT          | Control group received periodontal treatment (SRP)                                                                           |
| Al-Mubarak et al. 2002 (57)      | RCT          | Control group received periodontal treatment (SRP)                                                                           |
| Iwamoto et al. 2001 (58)         | UCT          | No control group                                                                                                             |
| Rocha et al. 2001 (59)           | RCT          | Control group received periodontal treatment (SRP)                                                                           |
| Christgau et al. 1998 (60)       | CCT          | Control group contained systemically healthy subjects with periodontitis. Control group received periodontal treatment (SRP) |

| Author                              | Study design | Main reason for rejection                          |
|-------------------------------------|--------------|----------------------------------------------------|
| Grossi et al. 1997 (61)             | RCT          | Control group received periodontal treatment (SRP) |
| Grossi et al. 1996 (62)             | RCT          | Control group received periodontal treatment (SRP) |
| Smith et al. 1996 (63)              | UCT          | No control group                                   |
| Westfelt et al. 1996 (64)           | UCT          | No control group                                   |
| Aldridge et al. 1995 (65), study I  | RCT          | Study duration < 3 months                          |
| Aldridge et al. 1995 (65), study II | RCT          | Study duration < 3 months                          |
| Miller et al. 1992 (66)             | UCT          | No control group                                   |
| Seppala & Ainamo 1994 (67)          | UCT          | No control group                                   |
| Seppala et al. 1993 (68)            | UCT          | No control group                                   |
| Wolf 1977 (69)                      | UCT          | No control group                                   |

*Abbreviations:* CCT = controlled clinical trial; RCT = randomized clinical trial; SRP = scaling and root planing; UCT = uncontrolled clinical trial

## REFERENCES

1. Nelson RG: Periodontal disease and diabetes. *Oral Dis* 14:204-205, 2008
2. Lalla E: Periodontal infections and diabetes mellitus: when will the puzzle be complete? *J Clin Periodontol* 34:913-916, 2007
3. Friedlander AH: Comprehensive dental therapy (periodontal and exodontia) removes inflammatory foci and aids in glycemic control. *J Clin Periodontol* 34:459; author reply 460, 2007
4. Watts T: Periodontal treatment and glycemic control in diabetic patients: the problem of a possible Hawthorne effect. *J Dent Res* 85:294; author reply 294-295, 2006
5. Dietrich T, Garcia RI: Associations between periodontal disease and systemic disease: evaluating the strength of the evidence. *J Periodontol* 76:2175-2184, 2005
6. Darre L, Vergnes JN, Gourdy P, Sixou M: Efficacy of periodontal treatment on glycaemic control in diabetic patients: A meta-analysis of interventional studies. *Diabetes Metab* 34:497-506, 2008
7. Mealey BL, Rose LF: Diabetes mellitus and inflammatory periodontal diseases. *Curr Opin Endocrinol Diabetes Obes* 15:135-141, 2008
8. Mealey BL, Rose LF: Diabetes mellitus and inflammatory periodontal diseases. *Compend Contin Educ Dent* 29:402-408, 410, 412-403, 2008
9. Taylor GW, Borgnakke WS: Periodontal disease: associations with diabetes, glycemic control and complications. *Oral Dis* 14:191-203, 2008
10. Kuo LC, Polson AM, Kang T: Associations between periodontal diseases and systemic diseases: a review of the inter-relationships and interactions with diabetes, respiratory diseases, cardiovascular diseases and osteoporosis. *Public Health* 122:417-433, 2008
11. Skamagas M, Breen TL, LeRoith D: Update on diabetes mellitus: prevention, treatment, and association with oral diseases. *Oral Dis* 14:105-114, 2008
12. Perrino MA: Diabetes and periodontal disease: an example of an oral/systemic relationship. *N Y State Dent J* 73:38-41, 2007
13. Mealey BL, Ocampo GL: Diabetes mellitus and periodontal disease. *Periodontol* 2000 44:127-153, 2007
14. Mealey BL: Periodontal disease and diabetes. A two-way street. *J Am Dent Assoc* 137 Suppl:26S-31S, 2006

15. Mealey BL, Oates TW: Diabetes mellitus and periodontal diseases. *J Periodontol* 77:1289-1303, 2006
16. Herring ME, Shah SK: Periodontal disease and control of diabetes mellitus. *J Am Osteopath Assoc* 106:416-421, 2006
17. Anil S, Al-Ghamdi HS: The impact of periodontal infections on systemic diseases. An update for medical practitioners. *Saudi Med J* 27:767-776, 2006
18. Nesse W, Spijkervat FK, Abbis F, Vissink A: [Links between periodontal disease and general health. 2. Preterm birth, diabetes and autoimmune diseases]. *Ned Tijdschr Tandheelkd* 113:191-196, 2006
19. Janket SJ, Wightman A, Baird AE, Van Dyke TE, Jones JA: Does periodontal treatment improve glycemic control in diabetic patients? A meta-analysis of intervention studies. *J Dent Res* 84:1154-1159, 2005
20. D'Aiuto F, Graziani F, Tete S, Gabriele M, Tonetti MS: Periodontitis: from local infection to systemic diseases. *Int J Immunopathol Pharmacol* 18:1-11, 2005
21. Pucher J, Stewart J: Periodontal disease and diabetes mellitus. *Curr Diab Rep* 4:46-50, 2004
22. Taylor GW: The effects of periodontal treatment on diabetes. *J Am Dent Assoc* 134 Spec No:41S-48S, 2003
23. Mealey BL, Rethman MP: Periodontal disease and diabetes mellitus. Bidirectional relationship. *Dent Today* 22:107-113, 2003
24. Moore PA: The diabetes-oral health connection. *Compend Contin Educ Dent* 23:14-20, 2002
25. Taylor GW: Bidirectional interrelationships between diabetes and periodontal diseases: an epidemiologic perspective. *Ann Periodontol* 6:99-112, 2001
26. Grossi SG: Treatment of periodontal disease and control of diabetes: an assessment of the evidence and need for future research. *Ann Periodontol* 6:138-145, 2001
27. Mealey BL: Diabetes and periodontal disease: two sides of a coin. *Compend Contin Educ Dent* 21:943-946, 948, 950, passim; quiz 956, 2000
28. Taylor GW, Loesche WJ, Terpenning MS: Impact of oral diseases on systemic health in the elderly: diabetes mellitus and aspiration pneumonia. *J Public Health Dent* 60:313-320, 2000
29. Mealey B: Diabetes and periodontal diseases. *J Periodontol* 70:935-949, 1999
30. Gustke CJ: Treatment of periodontitis in the diabetic patient. A critical review. *J Clin Periodontol* 26:133-137, 1999
31. Taylor GW: Periodontal treatment and its effects on glycemic control: a review of the evidence. *Oral Surg Oral Med Oral Pathol Oral Radiol Endod* 87:311-316, 1999
32. Grossi SG, Genco RJ: Periodontal disease and diabetes mellitus: a two-way relationship. *Ann Periodontol* 3:51-61, 1998
33. Saadoun AP: Diabetes and periodontal disease: a review and update. *J West Soc Periodontol Periodontol Abstr* 28:116-139, 1980
34. Scopp IW: Periodontics and diabetes. *N Y J Dent* 47:9-11, 1977
35. Dag A, Firat ET, Arikan S, Kadiroglu AK, Kaplan A: The effect of periodontal therapy on serum TNF-alpha and HbA1c levels in type 2 diabetic patients. *Aust Dent J* 54:17-22, 2009
36. Matsumoto S, Ogawa H, Soda S, Hirayama S, Amarasena N, Aizawa Y, Miyazaki H: Effect of antimicrobial periodontal treatment and maintenance on serum adiponectin in type 2 diabetes mellitus. *J Clin Periodontol* 36:142-148, 2009
37. Tervonen T, Lamminsalo S, Hiltunen L, Raunio T, Knuuttila M: Resolution of periodontal inflammation does not guarantee improved glycemic control in type 1 diabetic subjects. *J Clin Periodontol* 36:51-57, 2009

38. Llambes F, Silvestre FJ, Hernandez-Mijares A, Guiha R, Caffesse R: The effect of periodontal treatment on metabolic control of type 1 diabetes mellitus. *Clin Oral Investig* 12:337-343, 2008
39. Madden TE, Herriges B, Boyd LD, Laughlin G, Chiodo G, Rosenstein D: Alterations in HbA1c following minimal or enhanced non-surgical, non-antibiotic treatment of gingivitis or mild periodontitis in type 2 diabetic patients: a pilot trial. *J Contemp Dent Pract* 9:9-16, 2008
40. da Cruz GA, de Toledo S, Sallum EA, Sallum AW, Ambrosano GM, de Cassia Orlandi Sardi J, da Cruz SE, Goncalves RB: Clinical and laboratory evaluations of non-surgical periodontal treatment in subjects with diabetes mellitus. *J Periodontol* 79:1150-1157, 2008
41. Goncalves D, Correa FO, Khalil NM, de Faria Oliveira OM, Orrico SR: The effect of non-surgical periodontal therapy on peroxidase activity in diabetic patients: a case-control pilot study. *J Clin Periodontol* 35:799-806, 2008
42. Correa FO, Goncalves D, Figueredo CM, Gustafsson A, Orrico SR: The short-term effectiveness of non-surgical treatment in reducing levels of interleukin-1beta and proteases in gingival crevicular fluid from patients with type 2 diabetes mellitus and chronic periodontitis. *J Periodontol* 79:2143-2150, 2008
43. Makiura N, Ojima M, Kou Y, Furuta N, Okahashi N, Shizukuishi S, Amano A: Relationship of *Porphyromonas gingivalis* with glycemic level in patients with type 2 diabetes following periodontal treatment. *Oral Microbiol Immunol* 23:348-351, 2008
44. O'Connell PA, Taba M, Nomizo A, Foss Freitas MC, Suaid FA, Uyemura SA, Trevisan GL, Novaes AB, Souza SL, Palioto DB, Grisi MF: Effects of periodontal therapy on glycemic control and inflammatory markers. *J Periodontol* 79:774-783, 2008
45. McCoy LC, Wehler CJ, Rich SE, Garcia RI, Miller DR, Jones JA: Adverse events associated with chlorhexidine use: results from the Department of Veterans Affairs Dental Diabetes Study. *J Am Dent Assoc* 139:178-183, 2008
46. Navarro-Sanchez AB, Faria-Almeida R, Bascones-Martinez A: Effect of non-surgical periodontal therapy on clinical and immunological response and glycaemic control in type 2 diabetic patients with moderate periodontitis. *J Clin Periodontol* 34:835-843, 2007
47. Lalla E, Kaplan S, Yang J, Roth GA, Papapanou PN, Greenberg S: Effects of periodontal therapy on serum C-reactive protein, sE-selectin, and tumor necrosis factor-alpha secretion by peripheral blood-derived macrophages in diabetes. A pilot study. *J Periodontol Res* 42:274-282, 2007
48. Campus G, Salem A, Sacco G, Maida C, Cagetti MG, Tonolo G: Clinical effects of mechanical periodontal therapy in type 2 diabetic patients. *Diabetes Res Clin Pract* 75:368-369, 2007
49. Yun F, Firkova EI, Jun-Qi L, Xun H: Effect of non-surgical periodontal therapy on patients with type 2 diabetes mellitus. *Folia Med (Plovdiv)* 49:32-36, 2007
50. Sonoki K, Nakashima S, Takata Y, Naito T, Fujisawa K, Ootsubo T, Wakisaka M, Iwase M, Iida M, Yokota M: Decreased lipid peroxidation following periodontal therapy in type 2 diabetic patients. *J Periodontol* 77:1907-1913, 2006
51. Talbert J, Elter J, Jared HL, Offenbacher S, Southerland J, Wilder RS: The effect of periodontal therapy on TNF-alpha, IL-6 and metabolic control in type 2 diabetics. *J Dent Hyg* 80:7, 2006
52. Schara R, Medvescek M, Skaleric U: Periodontal disease and diabetes metabolic control: a full-mouth disinfection approach. *J Int Acad Periodontol* 8:61-66, 2006



53. Quirynen M, Bollen CM, Vandekerckhove BN, Dekeyser C, Papaioannou W, Eyssen H: Full- vs. partial-mouth disinfection in the treatment of periodontal infections: short-term clinical and microbiological observations. *J Dent Res* 74:1459-1467, 1995
54. Faria-Almeida R, Navarro A, Bascones A: Clinical and metabolic changes after conventional treatment of type 2 diabetic patients with chronic periodontitis. *J Periodontol* 77:591-598, 2006
55. Skaleric U, Schara R, Medvescek M, Hanlon A, Doherty F, Lessem J: Periodontal treatment by Arestin and its effects on glycemic control in type 1 diabetes patients. *J Int Acad Periodontol* 6:160-165, 2004
56. Rodrigues DC, Taba MJ, Novaes AB, Souza SL, Grisi MF: Effect of non-surgical periodontal therapy on glycemic control in patients with type 2 diabetes mellitus. *J Periodontol* 74:1361-1367, 2003
57. Al-Mubarak S, Ciancio S, Aljada A, Mohanty P, Ross C, Dandona P: Comparative evaluation of adjunctive oral irrigation in diabetics. *J Clin Periodontol* 29:295-300, 2002
58. Iwamoto Y, Nishimura F, Nakagawa M, Sugimoto H, Shikata K, Makino H, Fukuda T, Tsuji T, Iwamoto M, Murayama Y: The effect of antimicrobial periodontal treatment on circulating tumor necrosis factor-alpha and glycated hemoglobin level in patients with type 2 diabetes. *J Periodontol* 72:774-778, 2001
59. Rocha M, Nava LE, Vazquez de la Torre C, Sanchez-Marin F, Garay-Sevilla ME, Malacara JM: Clinical and radiological improvement of periodontal disease in patients with type 2 diabetes mellitus treated with alendronate: a randomized, placebo-controlled trial. *J Periodontol* 72:204-209, 2001
60. Christgau M, Palitzsch KD, Schmalz G, Kreiner U, Frenzel S: Healing response to non-surgical periodontal therapy in patients with diabetes mellitus: clinical, microbiological, and immunologic results. *J Clin Periodontol* 25:112-124, 1998
61. Grossi SG, Skrepcinski FB, DeCaro T, Robertson DC, Ho AW, Dunford RG, Genco RJ: Treatment of periodontal disease in diabetics reduces glycated hemoglobin. *J Periodontol* 68:713-719, 1997
62. Grossi SG, Skrepcinski FB, DeCaro T, Zambon JJ, Cummins D, Genco RJ: Response to periodontal therapy in diabetics and smokers. *J Periodontol* 67:1094-1102, 1996
63. Smith GT, Greenbaum CJ, Johnson BD, Persson GR: Short-term responses to periodontal therapy in insulin-dependent diabetic patients. *J Periodontol* 67:794-802, 1996
64. Westfelt E, Rylander H, Blohme G, Jonasson P, Lindhe J: The effect of periodontal therapy in diabetics. Results after 5 years. *J Clin Periodontol* 23:92-100, 1996
65. Aldridge JP, Lester V, Watts TL, Collins A, Viberti G, Wilson RF: Single-blind studies of the effects of improved periodontal health on metabolic control in type 1 diabetes mellitus. *J Clin Periodontol* 22:271-275, 1995
66. Miller LS, Manwell MA, Newbold D, Reding ME, Rasheed A, Blodgett J, Kornman KS: The relationship between reduction in periodontal inflammation and diabetes control: a report of 9 cases. *J Periodontol* 63:843-848, 1992
67. Seppala B, Ainamo J: A site-by-site follow-up study on the effect of controlled versus poorly controlled insulin-dependent diabetes mellitus. *J Clin Periodontol* 21:161-165, 1994
68. Seppala B, Seppala M, Ainamo J: A longitudinal study on insulin-dependent diabetes mellitus and periodontal disease. *J Clin Periodontol* 20:161-165, 1993
69. Wolf J: Dental and periodontal conditions in diabetes mellitus. A clinical and radiographic study. *Proc Finn Dent Soc* 73:1-56, 1977
